# Supplementary material for: The Relationship between Economic Freedom and Economic Growth: The Transistion Process in Vietnam and China
Source: Royal Society of Chemistry journal article supplement (doi:10.1039/d3sm01098h), 2010-01-01
Supplement: d3sm01098h1.pdf [file d3sm01098h1.pdf]

Supporting Information:  
Composition and temperature effects on the solution structure of  
SDS/octanol/brine by SANS, NMR and microscopy

Liva Donina, Lionel Porcar, and João T. Cabral\*

October 16, 2023

1 NMR characterisation of pure components SDS and octanol in solution

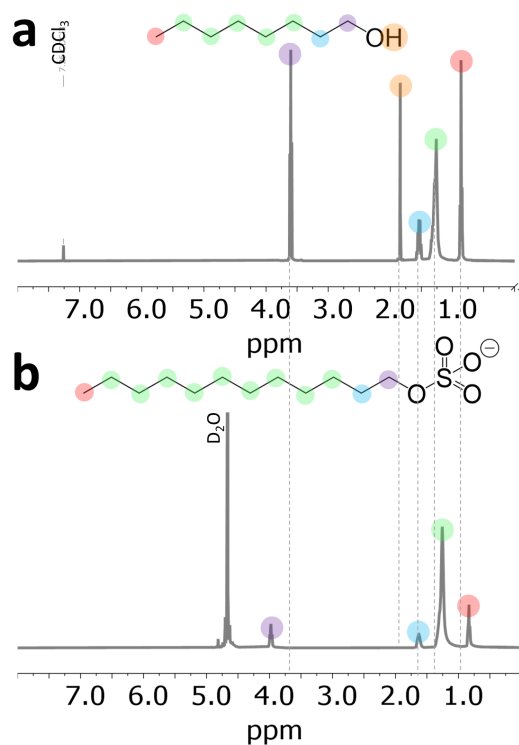

Figure S1:  $^1\text{H}$  NMR of 6.5 % w/w SDS in  $\text{D}_2\text{O}$  and 7.9 % w/w octanol in  $\text{CDCl}_3$  at 25 °C

## 2 SANS model description

### 2.1 SLD calculations

Scattering length densities (SLD) were estimated following standard procedures, for various oct:SDS ratios, as well as expected dimensions and tilt of surfactant aggregates, as described in Fig. S2.

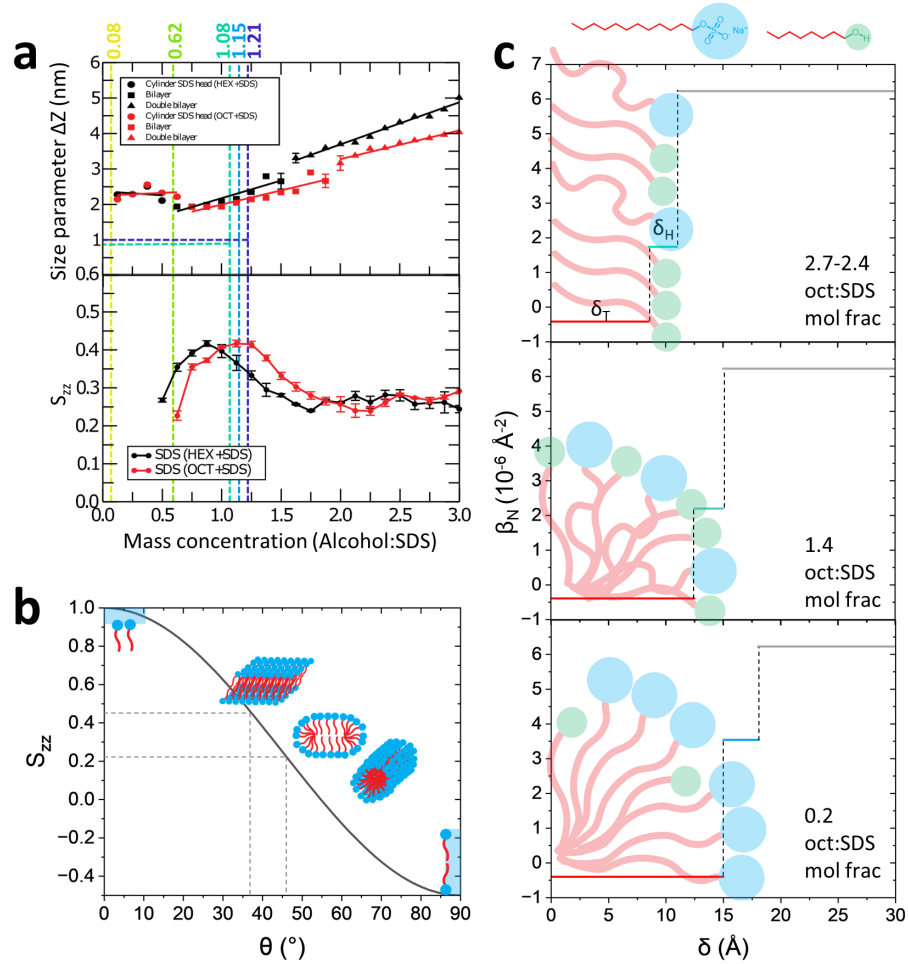

Figure S2: Molecular dimensions and SLDs for samples with oct:SDS ratios of 1.21, 1.15, 1.08, 0.62 and 0.08 a)  $\Delta Z$ , which corresponds to membrane thickness or micellar radius as a function of octanol concentration (top),  $S_{zz}$  parameter as a function of octanol concentration (bottom) describing the surfactant tail tilt, -0.5 corresponds to tails parallel to water interface while 1.0 corresponds to tails normal to water interface, b) Surfactant tail tilt in the systems of interest; c) SLD calculations of lamellar 1.08-1.21 (top), mixed 0.62 (middle) and micellar 0.08 (bottom).

### 2.2 Structure of SDS/octanol/brine sponge phase $L_3$

Quantitative description of sponge phase  $L_3$  for the molar octanol:SDS ratio of 0.27 (or 1.21 w/w) was achieved by fitting structure factor  $S(q)$  model (1) described by Lei et al. [1],

$$S(q) = 1 + \frac{A \arctan[q\xi_{io}/2]}{q} + \frac{B}{\xi_3^{-2} + (q - q_3)^2} \quad (1)$$

where  $\xi_{io}$  is inside/outside correlation length which describes correlation on a large scale much larger than  $\xi_3$  which

describes sponge pore correlation length.  $q_3$  is the position of the Bragg peak (conversely, average sponge pore size is  $\xi = 2\pi/q_3$ ) and A and B are  $S(q)$  prefactors. The structure factor is dominated by the second term (prefactor B) because the membrane concentration is relatively small. Porcar et al [2] report  $\xi_3$  of values around 85 Å which are the values we fit for our system.

Analytic approximation describing membrane "discoids" (2) was employed to describe the form factor  $P(q)$  [2],

$$P(q) = 4(\pi\sigma^2\Delta\rho)^2 \frac{1 - \cos[qt_0] \exp[-q^2 t_0^2/32]/q^2}{q^2\sigma^2 + 2 \exp[-q\sigma^2/6]} \quad (2)$$

where  $\sigma$  is the radius of gyration of the discoid,  $t_0$  thickness of membrane's hydrocarbon core, which in this case is between 17-30 Å and  $\Delta\rho$  is the neutron contrast between the hydrocarbon tail and solvent has been estimated to be  $5.9 \text{ \AA}^{-2} 10^{-6}$  from the molecular volume. Overall thickness of sponge phase membrane  $\delta$  is  $t_0 + 5$ .

The observed coherent scattering  $I_{coh}$  is

$$I_{coh}(q) = NS(q)P(q) \quad (3)$$

where  $N = \phi_v/\pi\sigma^2\delta$  where  $\phi_v$  is membrane volume fraction calculated as  $(V_{octanol} + V_{SDS})/V_{total}$

### 2.3 Structure of SDS/octanol/brine lamellar phase $L_\alpha$

Lamellar structures were fitted with a Caillé structure factor model [3] preprogrammed in SASView considering scattering from surfactant head and tail groups separately. The structure factor is given by

$$S(q) = 1 + 2 \sum_{n=1}^{N-1} \left(1 - \frac{n}{N}\right) \cos(qdn) \exp\left(-\frac{2q^2 d^2 \alpha(n)}{2}\right) \quad (4)$$

where N is number of lamellar stacks and

$$\alpha(n) = \frac{\eta_{cp}}{4\pi^2} (\ln(\pi n) + \gamma_E) \quad (5)$$

with  $\eta_{cp} = \frac{q_0^2 k_B T}{8\pi\sqrt{KB}}$  being Caillé parameter where  $K$  is the membrane bending rigidity  $\bar{B}$  is the membrane compression modulus.  $\gamma_E$  is Euler's constant with value of 0.58. The form factor reads

$$P(q) = \frac{4}{q^2} \Delta\rho_H^2 (\sin[q(\delta_H + \delta_T)])^2 - \Delta\rho_T^2 (\sin(q\delta_T))^2 \quad (6)$$

Where  $\Delta\rho_H$  is  $SLD_H - SLD_{brine}$  and  $\Delta\rho_T$  is  $SLD_{tail} - SLD_H$ ;  $\delta_H$  is the thickness of the headgroup ( $-OH$ ) and  $-SO_4Na$ ) and  $\delta_T$  is the hydrocarbon chain of octanol and SDS.

The coherent scattering  $I_{coh}$  is given by

$$I(q) = 2\pi \frac{P(q)S(q)}{q^2\delta} \quad (7)$$

We explore the parameter space by varying one parameter as shown in Fig. S2. Since we are working with dilute lamellar phases, broad peaks are often observed. Peak shape is can be described by Caillé parameter  $\eta$  and d-spacing polydispersity  $p_D$ . Fig. S3b shows the effect of the degree of  $p_D$  and shows that a degree of polydispersity is required to characterise lamellar phases investigated in this work.

An example fit is given in S4 where the effect of varying  $p_D$  and  $\eta$  is shown. This fitting demonstrates the need to vary both  $p_D$  and  $\eta$  as the low  $q$  region cannot be fitted with varying  $\eta$  alone.

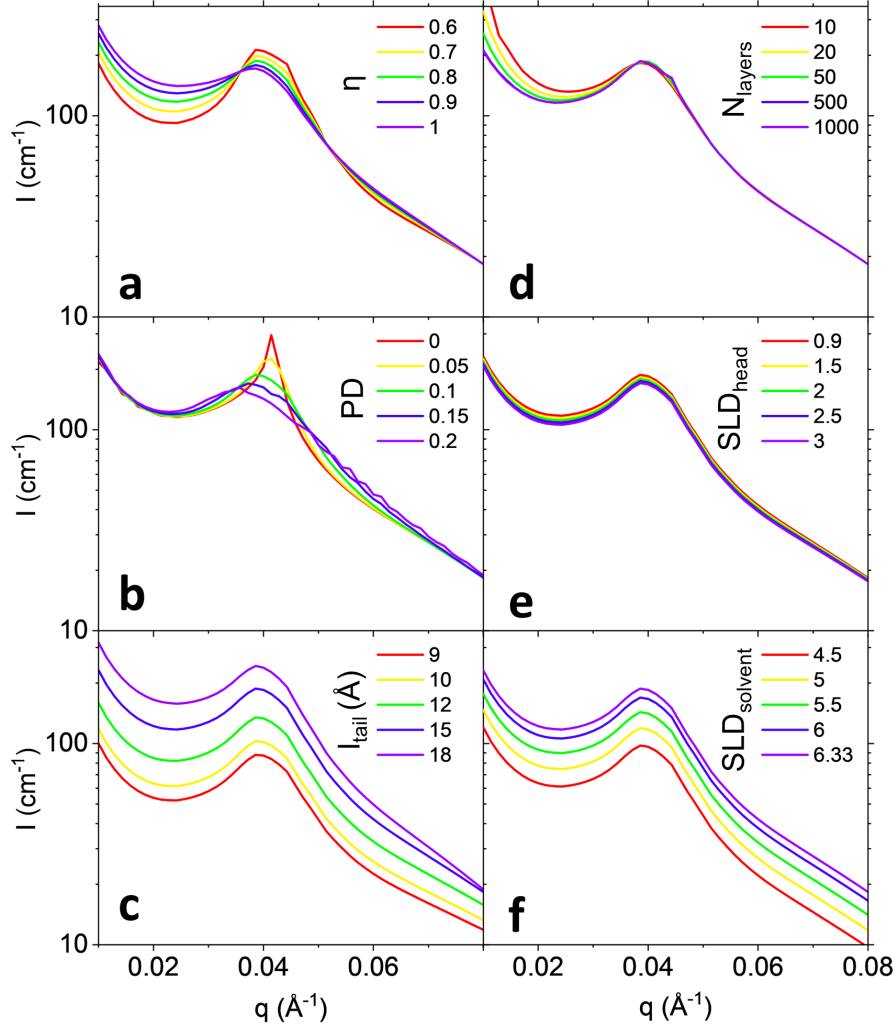

Figure S3: Parameters in Caillé  $S(q)$  structure factor model. a) Caillé parameter ( $\eta = 0.6 - 1.0$ ) describing lamellar membrane physical properties; b) Polydispersity of d-spacing ( $p_D = 0 - 0.25$ ) describing Gaussian d-spacing distribution; c) Surfactant hydrocarbon tail length ( $l_{tail} = 9 - 18 \text{ \AA}$ ); d) Number of lamellar stacks ( $N_{layers} = 10 - 1000$ ); e) Scattering length density for the headgroup consisting of  $-SO_4$  and  $-OH$  ( $SLD_{head} = 0.9 - 3 \text{ \AA}^{-2}10^{-6}$ ); f) Scattering length density for the solvent ( $D_2O$  and  $NaCl$ ) ( $SLD_{head} = 4.5 - 6.33 \text{ \AA}^{-2}10^{-6}$ ).

Bjerrum length  $\lambda_B$  and Debye length  $\lambda_D$  were calculated to correlate the structural changes observed in the lamellar  $L_\alpha$  phase upon increasing temperature and dilution. The Bjerrum length reads

$$\lambda_B = \frac{e^2}{4\pi\epsilon_w\epsilon_0k_B T} \quad (8)$$

where  $e$  is elementary charge,  $\epsilon_w$  is the dielectric constant of water,  $\epsilon_0$  is the vacuum permittivity,  $k_B$  is Boltzmann constant and  $T$  is temperature in K. At a first glance, one might think that increasing temperature will decrease  $\lambda_B$ . However,  $\epsilon_w$  decreases with increasing  $T$  which will result in overall increase of  $\lambda_B$  with temperature. Addition of an electrolyte will further decrease  $\epsilon_w$ . The value for  $\epsilon_w$  in presence of 0.3 M  $NaCl$  (concentrations of  $NaCl$  in solutions used in our study) is 74.5 at 25 °C, lower than that of 78.3 in just water. Empirically, the effect of  $T$  on  $\epsilon_w$  is expected [4] to follow:

$$\epsilon_w(T) = 87.740 - 0.4008T + 9.398 \times 10^{-4}T^2 - 1.410 \times 10^{-6}T^3 \quad (9)$$

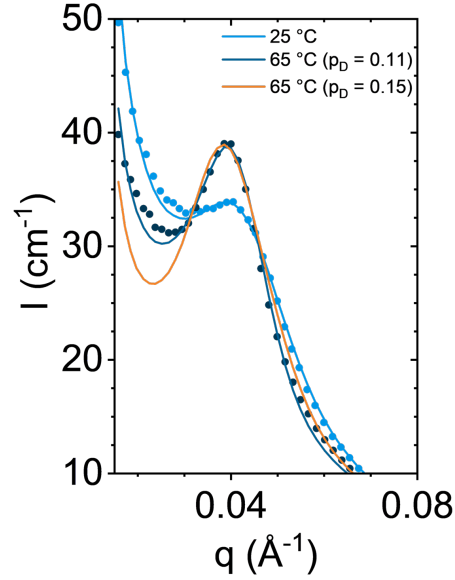

Figure S4: Comparison between polydispersity  $p_D$  values in fitting.  $p_D=0.15$  and Caillé parameter  $\eta=1$  at 25 °C;  $p_D = 0.11$  and  $\eta=0.9$  at 65 °C;  $p_D=0.15$  and  $\eta = 0.75$  at 65 °C.

We obtain the value of 74.5 for  $\epsilon_w$  at 25 °C in presence of 0.3 M NaCl solution from study by Gavish and Promislow [5] and back-calculation of  $\epsilon_w$  at 0 °C gives the value of 84.5.  $\lambda_B$  for 0 M and 0.3 M NaCl concentrations as a function of T is given in Fig. S5.

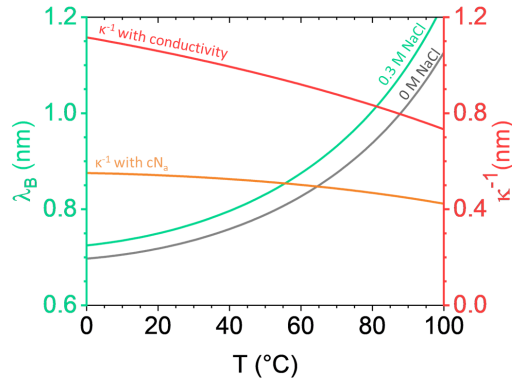

Figure S5: Bjerrum length  $\lambda_B$  and Debye length  $\kappa^{-1}$  as a function of T for 0 M and 0.3 M NaCl concentrations. Temperature effect on  $\lambda_B$  has been calculated for both 0 M and 0.3 M NaCl conditions showing an increase in  $\lambda_B$  with increasing T and NaCl (shown in green and grey lines,  $\kappa^{-1}$  Debye length has been calculated using conductivity approach (red) and from ionic strength (orange) considering only NaCl contributions)

The Debye length in electrolyte solutions is given by

$$\kappa^{-1} = \sqrt{\frac{\epsilon_w \epsilon_0 k_B T}{2e^2 N_a c}} \quad (10)$$

where  $N_a$  is Avogadro's constant and  $c$  is the concentration of the ionic species.

Alternatively, and perhaps more accurately, the Debye length  $\kappa^{-1}$  can be estimated from  $K_c$  measurements (which for the 6.5 % SDS, 7.9 % octanol and 85.6 % brine sample has been measured 10.2 mS/cm) and diffusion constant for  $Na^+$  and  $Cl^-$  ions is  $1.7 \mu m^2 m s^{-1}$ .

$$\kappa^{-1} = \sqrt{\frac{\epsilon_w \epsilon_0 D}{K_c}} \quad (11)$$

## 2.4 Structure of SDS/octanol/brine micellar $L_{mix}$ phase

In the mixed phase region between  $L_1$  and  $L_\alpha$  we observe exponent  $-k$  of  $\sim 3-4$  which is indicative of presence of multilamellar vesicles and elongated micelles. Here, the structures were described as the Caillé structure factor model and flexible cylinder sum. Flexible cylinder model is given by:

$$P(q) = \frac{scale}{V} F^2(q) + I_{incoh} \quad (12)$$

## 2.5 Structure of SDS/octanol/brine micellar $L_1$ phase

The addition of salt NaCl and mid-to-long chain 1-alcohol such as 1-octanol favours the formation of wormlike micelles. To describe these structures we fit core shell cylinder model [6] available on SasView. The form factor is given by (7):

$$F(q, \alpha) = (\rho_c - \rho_s) V_c \frac{\sin(q \frac{1}{2} L \cos \alpha)}{q \frac{1}{2} L \cos \alpha} \frac{2J_1(qR \sin \alpha)}{qR \sin \alpha} + (\rho_s - \rho_{solv}) V_s \frac{\sin(q(\frac{1}{2}L + T) \cos \alpha)}{q(\frac{1}{2}L + T) \cos \alpha} \frac{2J_1(q(R + T) \sin \alpha)}{q(R + T) \sin \alpha} \quad (13)$$

and

$$V_s = \pi(R + T)^2(L + 2T) \quad (14)$$

where  $\alpha$  is the angle between the cylinder and the scattering vector  $q$ ,  $\rho_c$  is the scattering length density of the core,  $\rho_s$  is the scattering length density of the shell and  $\rho_{solv}$  is the scattering length density of the solvent,  $V_s$  is the total volume of the cylinder,  $V_c$  is the the volume of the core (8),  $R$  is the radius of the core,  $L$  in the length of the core and  $T$  is the thickness of the shell. The outer radius is given by  $R + T$  and the total length including shell is  $L + 2T$ ;  $J_1$  is first order Bessel function.

The coherent scattering is given by (9):

$$I(q, \alpha) = \frac{scale}{V_s} F^2(q, \alpha) \sin(\alpha) + I_{incoh} \quad (15)$$

### 3 Lamellar phase $L_\alpha$ optical microscopy and SANS

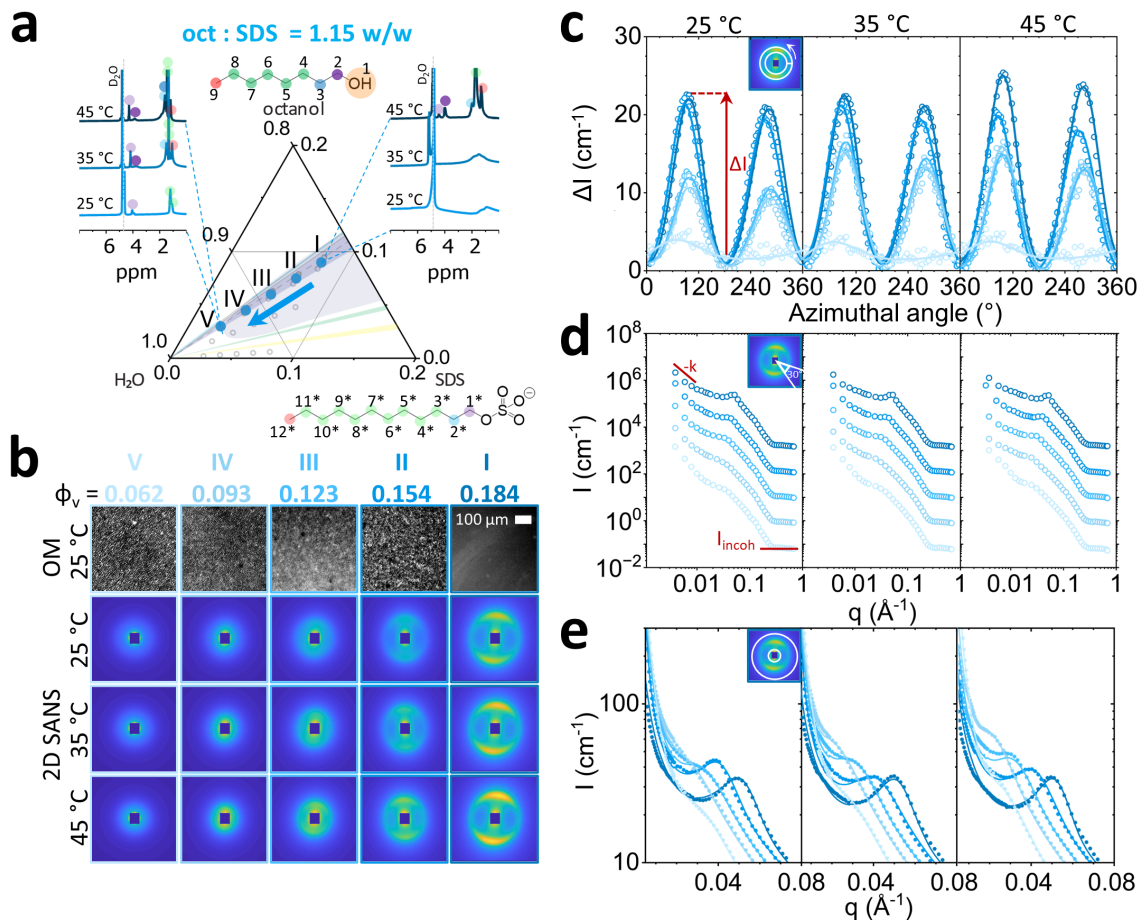

Figure S6: Lamellar phase along the dilution line towards  $H_2O$  corner with 1.15 w/w octanol:SDS ratio a) Overview of the experimentally measured compositions at octanol:SDS ratio 1.15,  $L_\alpha$  phase region. Specifically, SDS/octanol/ $H_2O$  brine: I) 7.8/9.0/82.2, II) 6.5/7.5/86.0, III) 5.2/6.0/88.8, IV) 3.9/4.5/91.6, V) 2.60/3.0/94.4 (prepared from dilution of I); for SANS and NMR samples,  $D_2O$  was used instead. Representative NMR spectra are shown for I) and V) as a function temperature. b) Corresponding birefringence and brightfield (BF) optical microscopy data at 25 °C and SANS at 25, 35 and 45 °C of samples I-V;  $\phi_v$  indicates the SDS+octanol volume fraction, i.e. total surfactant/co-surfactant content. c) Azimuthal profile of SANS data in b) around the respective Bragg peak for  $\Delta q = 0.014 \text{ \AA}^{-1}$ , subtracted by the respective  $I_{min}$  characterising scattering anisotropy. d) Sector average  $I(q)$  with a  $30^\circ$  angular range, normal pattern orientation; dashed lines indicate peak position(s). Data shifted vertically ( $\times 10$ ) for clarity. e) Radial average of SANS data near the peak; lines are fits to the lamellar model, described in the text.

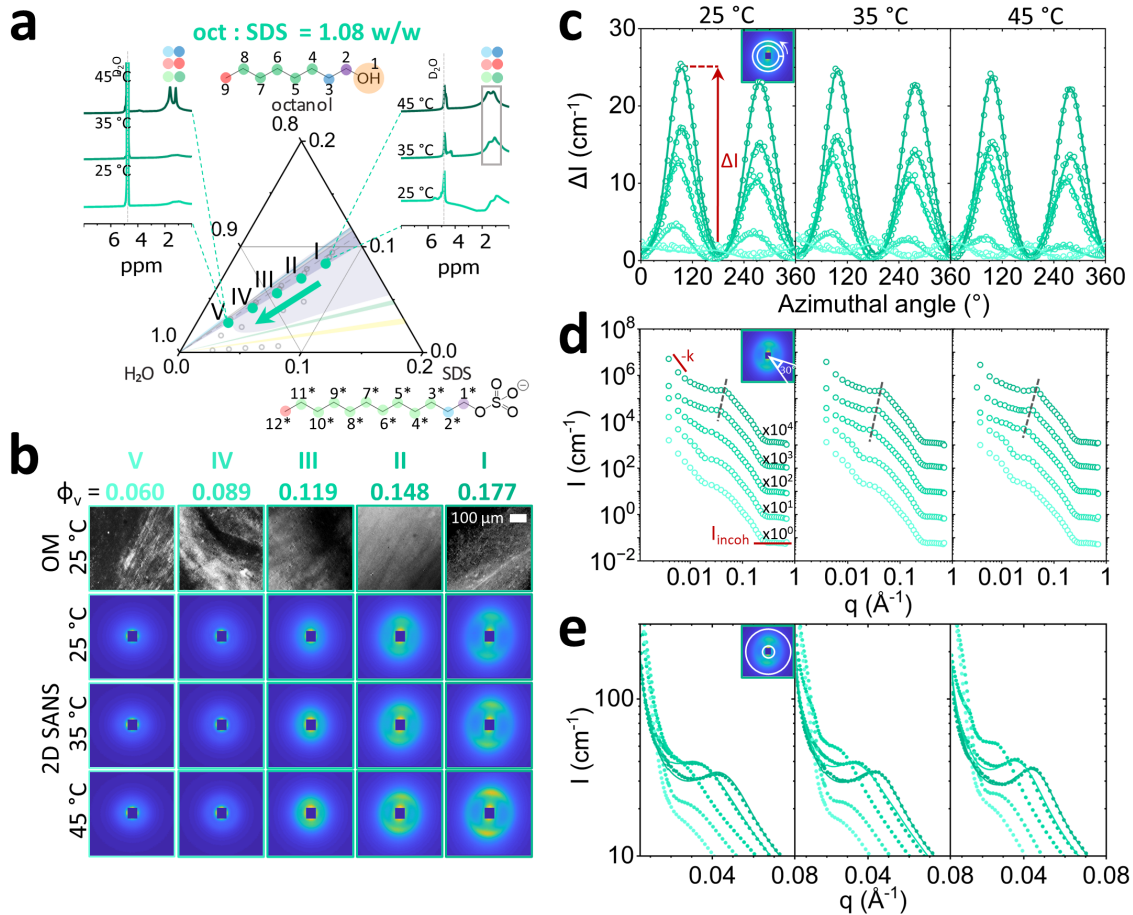

Figure S7: Lamellar phase along the dilution line towards  $H_2O$  corner with 1.08 w/w octanol:SDS ratio. a) Overview of the experimentally measured compositions at octanol:SDS ratio 1.08,  $L_\alpha$  phase region close to the mixed phase  $L_\alpha/L_4$ . Specifically, SDS/octanol/ $H_2O$  brine: I) 7.8/8.4/83.8, II) 6.5/7.0/86.5, III) 5.20/5.6/89.2, IV) 3.9/4.2/91.9, V) 2.6/2.8/94.6 (prepared from dilution of I); for SANS and NMR samples,  $D_2O$  was used instead. Representative NMR spectra are shown for I) and V) as a function temperature. b) Corresponding birefringence and brightfield (BF) optical microscopy data and SANS of samples I-V at 25, 35 and 45 °C;  $\phi_v$  indicates the SDS+octanol volume fraction, i.e. total surfactant/co-surfactant content. c) Azimuthal profile of SANS data in b) around the respective Bragg peak for  $\Delta q = 0.014 \text{ \AA}^{-1}$ , subtracted by the respective  $I_{\text{min}}$  characterising scattering anisotropy. d) Sector average  $I(q)$  with a  $30^\circ$  angular range, normal pattern orientation; dashed lines indicate peak position(s). Data shifted vertically ( $\times 10$ ) for clarity. e) Radial average of SANS data near the peak; lines are fits to the lamellar, described in the text.



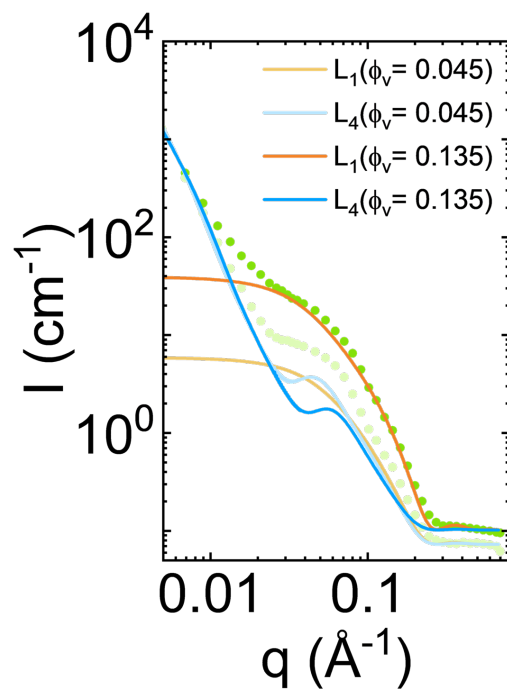

Figure S8: Illustrative  $L_1/L_4$  mixed phase model contributions for samples  $\phi_v = 0.045$  and  $\phi_v = 0.135$  at 25 °C. Orange colour fits indicate `flexible_cylinder` model contributions for  $L_1$  phase while blue colour fits indicate `lamellar_hg_stack_caille` model contributions for  $L_4$  phase. Overall, with sample dilution, the flexible cylinder model contribution becomes more apparent.

The data span 4 orders of magnitude in absolute intensity, and the models do not strictly apply across the entire  $q$ -range. Thus the  $\chi^2$  obtained are generally large, and used in relative terms to compare our results.

#### 4 Dilution fitting results at 25°C, 35°C and 45°C

| T, °C | $\phi_v$ | $I_{incoh}, \text{cm}^{-1}$ | scale | $\delta_{tail}, \text{Å}$ | $\delta_m, \text{Å}$ | $N_{layers}$ | d, Å      | $\eta$    | $p_D$ | $\chi^2$ |
|-------|----------|-----------------------------|-------|---------------------------|----------------------|--------------|-----------|-----------|-------|----------|
| 25    | 0.189    | 0.121                       | 0.91  | 8.5±0.1                   | 23.0                 | 1000         | 128.1±0.3 | 0.91±0.01 | 0.08  | 2044     |
|       | 0.158    | 0.109                       | 0.91  | 9.2±0.1                   | 24.4                 | 2000         | 150.7±0.3 | 1.00±0.01 | 0.10  | 1870     |
|       | 0.127    | 0.099                       | 1.00  | 9.5±0.1                   | 25.0                 | 1000         | 199.0±0.3 | 1.00±0.01 | 0.19  | 1850     |
|       | 0.096    | 0.064                       | 0.3   | 9.5±0.1                   | 25.0                 | 1000         | 273.7±0.3 | 1.00±0.01 | 0.22  | 96       |
|       | 0.064    | 0.055                       | 0.45  | 9.5±0.1                   | 25.0                 | 1000         | 395.0±0.3 | 1.00±0.01 | 0.25  | 161      |
| 35    | 0.189    | 0.113                       | 0.90  | 9.0±0.1                   | 24.0                 | 1000         | 118.1±0.3 | 0.75±0.07 | 0.06  | 9150     |
|       | 0.158    | 0.109                       | 0.35  | 9.0±0.1                   | 24.0                 | 1000         | 126.8±0.3 | 0.82±0.01 | 0.12  | 654      |

Table 1:  $L_\alpha$  Caillé model fitting results for dilution along the 1.21 oct:SDS ratio. Constant parameters,  $\delta_{head} = 3 \text{ Å}$ ,  $SLD_{brine} = 6.23 \cdot 10^{-6} \text{ Å}^{-2}$ ,  $SLD_{tail} = -0.416 \cdot 10^{-6} \text{ Å}^{-2}$ ,  $SLD_{head} = 1.7 \cdot 10^{-6} \text{ Å}^{-2}$

| T, °C | $\phi_v$ | $I_{incoh}, \text{cm}^{-1}$ | scale | B        | $\xi_3, \text{Å}$ | $\delta_m, \text{Å}$ | $\xi, \text{Å}$ | $\sigma, \text{Å}$ | $\chi^2$ |
|-------|----------|-----------------------------|-------|----------|-------------------|----------------------|-----------------|--------------------|----------|
| 35    | 0.189    | 0.121                       | 0.03  | 3.1E-04  | 150.0±1.5         | 23.5±0.2             | 236.1±0.2       | 30.0±0.2           | 9150     |
|       | 0.158    | 0.109                       | 0.65  | 1.82E-04 | 117.8±0.4         | 24.3±0.1             | 253.2±0.1       | 34.9±0.1           | 854      |
|       | 0.127    | 0.099                       | 0.89  | 0.63E-04 | 150.3±0.3         | 24.1±0.1             | 276.1±0.2       | 51.8±0.1           | 94       |
|       | 0.096    | 0.064                       | 0.97  | 0.7E-04  | 174.2±0.3         | 24.5±0.1             | 387.7±0.2       | 61.7±0.1           | 88       |
|       | 0.064    | 0.055                       | 1.00  | 1.5E-04  | 175.6±0.3         | 23.9±0.1             | 658.9±0.2       | 62.6±0.1           | 112      |
| 45    | 0.189    | 0.121                       | 0.91  | 2.6E-04  | 96.4±0.5          | 24.5±0.1             | 174.9±0.2       | 25.0±0.1           | 54       |
|       | 0.158    | 0.109                       | 0.98  | 1.3E-04  | 110.1±0.3         | 24.5±0.1             | 223.4±0.2       | 37.9±0.1           | 195      |
|       | 0.127    | 0.099                       | 0.85  | 1.6E-04  | 114.5±0.3         | 24.0±0.1             | 281.7±0.1       | 41.8±0.1           | 5        |
|       | 0.096    | 0.064                       | 0.75  | 1.5E-04  | 151.9±0.3         | 24.5±0.1             | 393.9±0.1       | 46.2±0.1           | 145      |
|       | 0.064    | 0.055                       | 0.70  | 1.8E-03  | 138.9±0.7         | 24.5±0.3             | 688.2±0.1       | 31.4±0.1           | 136      |

Table 2:  $L_3$  model fitting results for dilution along the 1.21 oct:SDS ratio. Constant parameters,  $\delta_{head} = 3.0 \text{ Å}$ ,  $A = 0.001$ ,  $\xi_{io} = 1000 \text{ Å}$ ,  $SLD_{contrast} = 5.9 \cdot 10^{-6} \text{ Å}^{-2}$

| T, °C | $\phi_v$ | $I_{incoh}, \text{cm}^{-1}$ | scale | $\delta_{tail}, \text{Å}$ | $\delta_m, \text{Å}$ | $N_{layers}$ | d, Å       | $\eta$    | $p_D$ | $\chi^2$ |
|-------|----------|-----------------------------|-------|---------------------------|----------------------|--------------|------------|-----------|-------|----------|
| 25    | 0.184    | 0.151                       | 0.67  | 8.8±0.1                   | 23.6                 | 2000         | 120.3±0.6  | 0.88±0.01 | 0.11  | 422      |
|       | 0.154    | 0.121                       | 0.64  | 9.0±0.1                   | 24.0                 | 1000         | 137.0±0.9  | 0.99±0.02 | 0.12  | 436      |
|       | 0.123    | 0.101                       | 1.00  | 10.2±0.2                  | 26.5                 | 1000         | 171.0±1.7  | 1.00±0.02 | 0.21  | 452      |
| 35    | 0.184    | 0.151                       | 0.72  | 8.3±0.1                   | 22.5                 | 5000         | 119.5±0.5  | 0.88±0.02 | 0.08  | 732      |
|       | 0.154    | 0.121                       | 0.51  | 10.5±0.1                  | 27.0                 | 1000         | 137.0±0.9  | 1.00±0.02 | 0.13  | 754      |
|       | 0.123    | 0.101                       | 1.0   | 10.2±0.2                  | 26.4                 | 1000         | 182.9±1.9  | 1.00±0.02 | 0.22  | 273      |
| 45    | 0.184    | 0.151                       | 0.72  | 8.3±0.1                   | 22.5                 | 5000         | 119.0±0.5  | 0.85±0.04 | 0.08  | 452      |
|       | 0.154    | 0.121                       | 0.57  | 9.3±0.1                   | 24.6                 | 300          | 144.0±0.9  | 0.98±0.04 | 0.13  | 713      |
|       | 0.123    | 0.101                       | 1.005 | 10.4±0.1                  | 26.7                 | 1000         | 187.72±1.9 | 1.00±0.02 | 0.21  | 614      |
|       | 0.093    | 0.065                       | 1.00  | 10.0±0.6                  | 25.9                 | 1000         | 247.9±2.8  | 1.00±0.05 | 0.23  | 395      |

Table 3:  $L_\alpha$  Caillé model with power law results for dilution along the 1.15 oct:SDS ratio. Constant parameters,  $\delta_{head} = 3 \text{ Å}$ ,  $SLD_{brine} = 6.23 \cdot 10^{-6} \text{ Å}^{-2}$ ,  $SLD_{tail} = -0.415 \cdot 10^{-6} \text{ Å}^{-2}$ ,  $SLD_{head} = 1.74 \cdot 10^{-6} \text{ Å}^{-2}$

| T, °C | $\phi_v$ | $I_{incoh}, \text{cm}^{-1}$ | scale | $\delta_{tail}, \text{\AA}$ | $\delta_m, \text{\AA}$ | $N_{layers}$ | d, $\text{\AA}$ | $\eta$          | $p_D$ | $\chi^2$ |
|-------|----------|-----------------------------|-------|-----------------------------|------------------------|--------------|-----------------|-----------------|-------|----------|
| 25    | 0.177    | 0.114                       | 0.55  | $9.7 \pm 0.1$               | 25.4                   | 250          | $128.0 \pm 0.9$ | $1.00 \pm 0.01$ | 0.15  | 944      |
|       | 0.148    | 0.107                       | 0.44  | $11.5 \pm 0.1$              | 28.9                   | 500          | $151.0 \pm 1.9$ | $1.00 \pm 0.01$ | 0.26  | 1393     |
| 35    | 0.177    | 0.114                       | 0.54  | $9.8 \pm 0.1$               | 25.5                   | 1000         | $128.4 \pm 0.9$ | $1.00 \pm 0.01$ | 0.15  | 563      |
|       | 0.148    | 0.107                       | 0.47  | $10.8 \pm 0.1$              | 27.6                   | 500          | $151.5 \pm 1.7$ | $1.00 \pm 0.01$ | 0.22  | 1219     |
| 45    | 0.177    | 0.114                       | 0.54  | $9.7 \pm 0.1$               | 25.4                   | 3000         | $129.3 \pm 0.7$ | $0.95 \pm 0.01$ | 0.11  | 439      |
|       | 0.148    | 0.107                       | 0.52  | $10.0 \pm 0.1$              | 26.0                   | 500          | $152.5 \pm 1.2$ | $0.99 \pm 0.01$ | 0.16  | 1150     |

Table 4:  $L_\alpha$  Caillé model fitting results for 1.08 oct:SDS ratio temperature scan. Constant parameters,  $\delta_{head} = 3 \text{\AA}$ ,  $SLD_{brine} = 6.23 \cdot 10^{-6} \text{\AA}^{-2}$ ,  $SLD_{tail} = -0.414 \cdot 10^{-6} \text{\AA}^{-2}$ ,  $SLD_{head} = 1.81 \cdot 10^{-6} \text{\AA}^{-2}$

| T, °C | $\phi_v$ | $I_{incoh}, \text{cm}^{-1}$ | d, $\text{\AA}$ | L, $\text{\AA}$ | $L_4/L_1$ | $\chi^2$ |
|-------|----------|-----------------------------|-----------------|-----------------|-----------|----------|
| 25    | 0.135    | 0.102                       | $89.0 \pm 0.3$  | $490 \pm 30$    | 0.63      | 133      |
|       | 0.113    | 0.095                       | $105.2 \pm 0.3$ | $309 \pm 35$    | 2.22      | 245      |
|       | 0.09     | 0.085                       | $108.2 \pm 0.3$ | $284 \pm 29$    | 3.15      | 185      |
|       | 0.068    | 0.067                       | $111.1 \pm 0.3$ | $291 \pm 40$    | 4.28      | 134      |
|       | 0.045    | 0.073                       | $112.7 \pm 0.3$ | $304 \pm 53$    | 4.34      | 90       |
| 35    | 0.135    | 0.104                       | $91.3 \pm 0.1$  | $480 \pm 30$    | 0.60      | 143      |
|       | 0.113    | 0.092                       | $106.9 \pm 0.4$ | $330 \pm 28$    | 2.31      | 231      |
|       | 0.09     | 0.084                       | $108.7 \pm 0.4$ | $287 \pm 30$    | 3.17      | 204      |
|       | 0.068    | 0.067                       | $112.9 \pm 0.4$ | $303 \pm 42$    | 4.48      | 140      |
|       | 0.045    | 0.073                       | $114.4 \pm 0.4$ | $311 \pm 55$    | 4.49      | 93       |
| 45    | 0.135    | 0.103                       | $97.1 \pm 0.4$  | $493 \pm 37$    | 0.62      | 120      |
|       | 0.113    | 0.091                       | $112.4 \pm 0.4$ | $402 \pm 37$    | 2.23      | 267      |
|       | 0.09     | 0.082                       | $118.4 \pm 0.1$ | $354 \pm 30$    | 3.64      | 174      |
|       | 0.068    | 0.065                       | $120.5 \pm 0.1$ | $391 \pm 72$    | 5.16      | 95       |
|       | 0.045    | 0.071                       | $120.7 \pm 0.1$ | $386 \pm 48$    | 4.35      | 65       |

Table 5:  $L_4/L_1$  lamellar + flexible cylinder fitting results for 0.62 oct:SDS ratio dilutions. Constant parameters,  $SLD_{brine} = 6.23 \cdot 10^{-6} \text{\AA}^{-2}$ ,  $SLD_{head} = 2.2 \cdot 10^{-6} \text{\AA}^{-2}$ ,  $SLD_{tail} = -0.45 \cdot 10^{-6} \text{\AA}^{-2}$ , scale = 0.25-0.4,  $l_{tail} = 9.5 \text{\AA}$ ,  $l_{head} = 3.0 \text{\AA}$ ,  $N_{layers} = 5$ ,  $\eta = 1$ ,  $b = 14 \pm 1 \text{\AA}$ ,  $R = 14 \pm 0.5 \text{\AA}$

| T, °C | $\phi_v$ | scale | $I_{incoh}, \text{cm}^{-1}$ | R, $\text{\AA}$ | L, $\text{\AA}$ | $\chi^2$ |
|-------|----------|-------|-----------------------------|-----------------|-----------------|----------|
| 25    | 0.085    | 0.09  | 0.07                        | $15.6 \pm 0.2$  | $54 \pm 10$     | 40       |
|       | 0.071    | 0.07  | 0.07                        | $15.3 \pm 0.3$  | $68 \pm 15$     | 20       |
|       | 0.057    | 0.05  | 0.06                        | $14.8 \pm 0.3$  | $150 \pm 20$    | 34       |
|       | 0.043    | 0.04  | 0.05                        | $14.8 \pm 0.7$  | $210 \pm 40$    | 26       |
| 35    | 0.085    | 0.09  | 0.07                        | $15.3 \pm 0.2$  | $50 \pm 10$     | 56       |
|       | 0.071    | 0.07  | 0.07                        | $15.0 \pm 0.3$  | $62 \pm 15$     | 108      |
|       | 0.057    | 0.05  | 0.06                        | $14.5 \pm 0.2$  | $130 \pm 20$    | 39       |
|       | 0.043    | 0.04  | 0.05                        | $14.5 \pm 0.4$  | $170 \pm 20$    | 24       |
| 45    | 0.085    | 0.09  | 0.07                        | $14.8 \pm 0.1$  | $45 \pm 10$     | 113      |
|       | 0.071    | 0.07  | 0.07                        | $15.4 \pm 0.3$  | $53 \pm 15$     | 113      |
|       | 0.057    | 0.05  | 0.06                        | $14.2 \pm 0.2$  | $115 \pm 40$    | 113      |
|       | 0.043    | 0.04  | 0.05                        | $14.1 \pm 0.4$  | $140 \pm 30$    | 113      |

Table 6:  $L_1$  fitting results for 0.08 oct:SDS ratio dilution. Constant parameters,  $\delta_{shell} = 3 \text{\AA}$ ,  $SLD_{brine} = 5.7 \cdot 10^{-6} \text{\AA}^{-2}$ ,  $SLD_{shell} = 3.0 \cdot 10^{-6} \text{\AA}^{-2}$ ,  $SLD_{core} = -0.45 \cdot 10^{-6} \text{\AA}^{-2}$

## 5 Temperature scan fitting results

| T, °C | scale | $\delta_{tail}$ , Å | $\delta_m$ , Å | d, Å      | $\eta$    | $p_D$ | $\chi^2$ |
|-------|-------|---------------------|----------------|-----------|-----------|-------|----------|
| 25    | 0.65  | 9.2±0.1             | 24.4           | 137.0±0.3 | 1.00±0.01 | 0.12  | 654      |
| 30    | 0.64  | 8.9±0.1             | 23.9           | 137.0±0.3 | 1.00±0.07 | 0.11  | 718      |
| 35    | 0.32  | 9.2±0.1             | 24.5           | 137.0±0.2 | 1.00±0.06 | 0.06  | 475      |

Table 7:  $L_\alpha$  Caillé model fitting results for 1.21 oct:SDS ratio temperature scan. Constant parameters,  $I_{incoh} = 0.109$ ,  $\delta_{head} = 3$  Å,  $N_{layers} = 50$

| T, °C | scale | B       | $\xi_3$ , Å | $\delta_m$ , Å | $\xi$ , Å | $\sigma$ , Å | $\chi^2$ |
|-------|-------|---------|-------------|----------------|-----------|--------------|----------|
| 35    | 0.68  | 4.6E-05 | 194.0±1.5   | 26.0±0.2       | 243.4±0.2 | 42.7±0.2     | 604      |
| 40    | 1.45  | 1.0E-04 | 114.9±0.4   | 27.0±0.1       | 219.2±0.1 | 39.8±0.1     | 234      |
| 45    | 1.47  | 1.4E-04 | 100.9±0.3   | 25.5±0.1       | 219.0±0.2 | 40.1±0.1     | 281      |
| 50    | 1.48  | 1.4E-04 | 97.0±0.3    | 25.3±0.1       | 215.3±0.2 | 40.7±0.1     | 252      |
| 55    | 1.52  | 1.4E-04 | 94.0±0.3    | 25.1±0.1       | 208.7±0.2 | 40.4±0.1     | 386      |
| 60    | 1.56  | 1.4E-04 | 91.0±0.3    | 25.9±0.1       | 202.0±0.1 | 40.0±0.1     | 570      |
| 65    | 1.56  | 1.5E-04 | 87.2±0.3    | 25.9±0.1       | 195.3±0.1 | 39.2±0.1     | 729      |
| 25    | 1.26  | 4.6E-5  | 151.1±0.7   | 25.5±0.0       | 237.3±0.1 | 49.6±0.1     | 552      |

Table 8:  $L_3$  model fitting results for 1.21 oct:SDS ratio temperature scan. Constant parameters,  $I_{incoh} = 0.12$ ,  $\delta_{head} = 3$  Å,  $N_{layers} = 50$

| T, °C | scale | $\delta_{tail}$ , Å | $\delta_m$ , Å | d, Å      | $\eta$    | $p_D$ | $\chi^2$ |
|-------|-------|---------------------|----------------|-----------|-----------|-------|----------|
| 25    | 0.86  | 10.2±0.3            | 26.3           | 137.0±3.0 | 1.00±0.02 | 0.14  | 263      |
| 30    | 0.86  | 10.2±0.3            | 26.3           | 137.0±3.0 | 1.00±0.02 | 0.14  | 306      |
| 35    | 0.87  | 10.2±0.3            | 26.4           | 137.0±3.0 | 1.00±0.02 | 0.13  | 604      |
| 40    | 1.00  | 9.4±0.3             | 24.9           | 142.1±3.0 | 1.00±0.02 | 0.13  | 234      |
| 45    | 0.98  | 9.2±0.3             | 24.4           | 144.2±3.0 | 0.99±0.01 | 0.12  | 281      |
| 50    | 0.99  | 9.0±0.3             | 24.1           | 145.6±3.0 | 0.97±0.02 | 0.12  | 252      |
| 55    | 0.90  | 8.9±0.3             | 23.7           | 146.2±2.0 | 0.98±0.02 | 0.11  | 386      |
| 60    | 0.99  | 8.7±0.3             | 23.4           | 146.7±2.0 | 0.98±0.02 | 0.11  | 570      |
| 65    | 0.90  | 8.5±0.3             | 23.0           | 148.4±2.0 | 0.90±0.01 | 0.12  | 729      |
| 25    | 0.99  | 9.3±0.3             | 24.5           | 150.0±1.0 | 0.98±0.01 | 0.12  | 552      |

Table 9:  $L_\alpha$  Caillé model fitting results for 1.15 oct:SDS ratio temperature scan. Parameters have been kept constant  $I_{incoh} = 0.12$ ,  $\delta_{head} = 3$  Å,  $N_{layers} = 50$

| T, °C | scale | $\delta_{tail}$ , Å | $\delta_m$ , Å | d, Å      | $\eta$    | $p_D$ | $\chi^2$ |
|-------|-------|---------------------|----------------|-----------|-----------|-------|----------|
| 25    | 0.47  | 10.5±0.2            | 27.0           | 152.9±0.6 | 1.00±0.02 | 0.24  | 184      |
| 30    | 0.50  | 10.1±0.2            | 26.2           | 153.6±0.5 | 1.00±0.02 | 0.22  | 169      |
| 35    | 0.53  | 9.7±0.1             | 25.3           | 154.2±0.4 | 1.00±0.01 | 0.18  | 224      |
| 40    | 0.55  | 9.3±0.1             | 24.6           | 154.5±0.4 | 1.00±0.01 | 0.15  | 201      |
| 45    | 0.56  | 9.1±0.1             | 24.2           | 155.0±0.3 | 1.00±0.01 | 0.13  | 252      |
| 50    | 0.56  | 8.9±0.1             | 23.8           | 155.4±0.4 | 1.00±0.02 | 0.12  | 284      |
| 55    | 0.56  | 8.7±0.1             | 23.3           | 156.5±0.3 | 0.99±0.02 | 0.11  | 429      |
| 60    | 0.56  | 8.5±0.1             | 23.0           | 157.0±0.4 | 0.98±0.02 | 0.11  | 585      |
| 65    | 0.55  | 8.4±0.1             | 22.9           | 157.1±0.4 | 0.97±0.01 | 0.11  | 641      |
| 25    | 0.50  | 9.4±0.1             | 24.7           | 160.0±0.4 | 1.00±0.01 | 0.13  | 625      |

Table 10:  $L_\alpha$  Caillé model fitting results for 1.08 oct:SDS ratio temperature scan. Constant parameters,  $I_{incoh} = 0.11$ ,  $\delta_{head} = 3$  Å,  $N_{layers} = 20$ ,

| T, °C | d, Å      | L, Å     | $L_4/L_1$ | $\chi^2$ |
|-------|-----------|----------|-----------|----------|
| 25    | 13.6±0.1  | 309±25   | 2.22      | 245      |
| 30    | 105.2±0.2 | 329±28   | 2.37      | 333      |
| 35    | 107.1±0.2 | 330±28   | 2.31      | 231      |
| 40    | 106.9±0.2 | 331±27   | 2.05      | 235      |
| 45    | 106.6±0.3 | 402±35   | 2.23      | 267      |
| 50    | 112.4±0.3 | 493±43   | 2.12      | 242      |
| 55    | 118.3±0.3 | 654±18   | 1.55      | 258      |
| 60    | 119.4±0.4 | 846±71   | 1.29      | 224      |
| 65    | 142.7±0.6 | 1008±86  | 1.02      | 227      |
| 25    | 157.2±0.7 | 1213±108 | 1.29      | 194      |

Table 11:  $L_4$ - $L_1$  fitting results for 0.62 oct:SDS ratio temperature scan. Constant parameters,  $I_{incoh} = 0.86$ - $0.89$   $\text{cm}^{-1}$ ,  $SLD_{brine} = 6.23 \cdot 10^{-6}$  Å<sup>-2</sup>

| T, °C | R, Å     | L, Å    | $\chi^2$ |
|-------|----------|---------|----------|
| 25    | 15.2±0.3 | 67.9±20 | 19       |
| 30    | 15.7±0.3 | 61.6±20 | 20       |
| 35    | 15.0±0.3 | 61.8±18 | 19       |
| 40    | 14.9±0.3 | 58.8±15 | 19       |
| 45    | 15.4±0.3 | 53.4±14 | 111      |
| 50    | 15.3±0.3 | 51.2±12 | 109      |
| 55    | 15.2±0.3 | 48.9±10 | 108      |
| 60    | 15.0±0.3 | 46.7±8  | 110      |
| 65    | 14.9±0.3 | 44.6±6  | 113      |
| 25    | 15.8±0.3 | 65.8±20 | 135      |

Table 12:  $L_1$  fitting results for 0.08 oct:SDS ratio temperature scan. Constant parameters, scale = 0.068-0.070  $I_{incoh} = 0.067$ - $0.069$   $\text{cm}^{-1}$ ,  $\delta_{shell} = 3$  Å,  $SLD_{brine} = 5.7 \cdot 10^{-6}$  Å<sup>-2</sup>,  $SLD_{shell} = 3.0 \cdot 10^{-6}$  Å<sup>-2</sup>,  $SLD_{core} = -0.45 \cdot 10^{-6}$  Å<sup>-2</sup>

## References

- [1] N. Lei, C. R. Safinya, D. Roux, and K. S. Liang. *Phys. Rev. E* 56(1), 608 - 613 (1997).
- [2] L. Porcar, W. A. Hamilton, P. D. Butler, and G. G. Warr. *Langmuir* 19(26), 10779 - 10794 (2003).
- [3] F. Nallet, R. Laversanne, and D. Roux. *J. Phys. II France* 3, 487-502 (1993).
- [4] C. G. Malmberg and A. A. Maryott. *J Res Natl Inst Stand Technol* 56(1), Paper 2641 (1956).
- [5] N. Gavish and K. Promislow. *Phys. Rev. E* 94, 012611 (2016).
- [6] L.A. Feigin and D.I. Svergun. Vol.1 Springer (1987).
- [7] S. R. Kline. *J Appl. Cryst.* 39, 895 (2006).
